# Supplementary material for: Characterization and tissue localization of zebrafish homologs of the human ABCB1 multidrug transporter
Source: PubMed Central journal article supplement (PMC8683423; doi:10.1038/s41598-021-03500-8), 2021-12-17
Supplement: 41598_2021_3500_MOESM1_ESM.pdf [file 41598_2021_3500_MOESM1_ESM.pdf]

## Supplementary Information

for

### **Characterization and tissue localization of zebrafish homologs of the human *ABCB1* multidrug transporter**

Robert W. Robey,<sup>1</sup> Andrea N. Robinson,<sup>1</sup> Fatima Ali-Rahmani,<sup>1</sup> Lyn M. Huff,<sup>1</sup> Sabrina Lusvardi,<sup>1</sup> Shahrooz Vahedi,<sup>1</sup> Jordan M. Hotz,<sup>1</sup> Andrew C. Warner,<sup>2</sup> Donna Butcher,<sup>2</sup> Jennifer Matta,<sup>2</sup> Elijah F. Edmondson,<sup>2</sup> Tobie D. Lee,<sup>3</sup> Jacob S. Roth,<sup>3</sup> Olivia W. Lee,<sup>3</sup> Min Shen,<sup>3</sup> Kandice Tanner,<sup>1</sup> Matthew D. Hall,<sup>3</sup> Suresh V. Ambudkar,<sup>1</sup> Michael M. Gottesman<sup>1\*</sup>

<sup>1</sup>Laboratory of Cell Biology, Center for Cancer Research, National Cancer Institute, National Institutes of Health, Bethesda, MD

<sup>2</sup>Molecular Histopathology Laboratory, Frederick National Laboratory for Cancer Research, Frederick, MD

<sup>3</sup>National Center for Advancing Translational Sciences, National Institutes of Health, Rockville, MD

**Table S1.** Cross-resistance profile of known human P-gp substrates with zebrafish Abcb4 and Abcb5<sup>a</sup>

| Compound     | GI <sub>50</sub> Vector (μM) | GI <sub>50</sub> MDR-19 (μM) | RR* MDR-19 | GI <sub>50</sub> Dr Abcb4 (μM) | RR* Dr Abcb4 | GI <sub>50</sub> Dr Abcb5 (μM) | RR* Dr Abcb5 |
|--------------|------------------------------|------------------------------|------------|--------------------------------|--------------|--------------------------------|--------------|
| Bisantrene   | 0.016±0.0042                 | 18.8±7.2                     | 1175       | 1.9±0.56                       | 119          | 0.37±0.04                      | 23           |
| Camptothecin | 0.009±0.004                  | 0.011±0.004                  | 1          | 0.009±0.001                    | 1            | 0.012±0.004                    | 1            |
| Doxorubicin  | 0.0092±0.0023                | 0.89±0.63                    | 97         | 1.3±0.45                       | 141          | 0.021±0.0072                   | 2            |
| Etoposide    | 0.25±0.062                   | 10.0±0.25                    | 40         | 2.9±0.62                       | 12           | 4.6±1.8                        | 18           |
| Mitoxantrone | 0.0053±0.0011                | 0.10±0.017                   | 19         | 0.090±0.035                    | 17           | 0.010±0.0036                   | 2            |
| Paclitaxel   | 0.0063±0.0012                | 1.7±0.83                     | 270        | 2.5±0.75                       | 397          | 0.79±1.05                      | 125          |
| Vinblastine  | 0.0029±0.0008                | 0.39±0.12                    | 134        | 0.26±0.06                      | 90           | 0.08±0.01                      | 28           |

<sup>a</sup>All compounds were tested at least 3 times. Results presented are mean GI<sub>50</sub> values +/- standard deviation.

\*Relative resistance (RR) value is the ratio of the GI<sub>50</sub> values of MDR-19, Dr Abcb4 or Dr Abcb5 cells to the GI<sub>50</sub> value of empty vector (Vector) cells.

**Table S2.** Cross-resistance profile of selected compounds from high-throughput screening<sup>a</sup>

| <b>Compound</b> | <b>GI<sub>50</sub><br/>Vector (μM)</b> | <b>GI<sub>50</sub><br/>MDR-19 (μM)</b> | <b>RR*<br/>MDR-19</b> | <b>GI<sub>50</sub><br/>Dr Abcb4 (μM)</b> | <b>RR*<br/>Dr Abcb4</b> | <b>GI<sub>50</sub><br/>Dr Abcb5 (μM)</b> | <b>RR*<br/>Dr Abcb5</b> |
|-----------------|----------------------------------------|----------------------------------------|-----------------------|------------------------------------------|-------------------------|------------------------------------------|-------------------------|
| 17-AAG          | 0.53±0.35                              | 4.5±2.4                                | 8                     | 7.0±0.82                                 | 13                      | 3.8±0.66                                 | 7                       |
| AT9283          | 1.9±0.26                               | 14.0±5.3                               | 7                     | 19.3±1.2                                 | 10                      | 20.7±8.3                                 | 11                      |
| KW-2478         | 0.44±0.31                              | 88.3±53.5                              | 200                   | 140±26                                   | 318                     | 37±27                                    | 84                      |
| Romidepsin      | 0.0026±0.0012                          | 0.85±0.56                              | 327                   | 2.3±0.31                                 | 884                     | 0.053±0.023                              | 20                      |
| VX-680          | 3.0±0.71                               | 14.8±7.5                               | 5                     | 36.5±2.9                                 | 12                      | 8.1±1.8                                  | 3                       |
| YM-155          | 0.0027±0.00059                         | 6.2±4.8                                | 2296                  | 375±66                                   | 138888                  | 0.021±0.0059                             | 8                       |

<sup>a</sup>All compounds were tested at least 3 times. Results presented are mean GI<sub>50</sub> values +/- standard deviation.

\*Relative resistance (RR) value is the ratio of the GI<sub>50</sub> values of MDR-19, Dr Abcb4 or Dr Abcb5 cells to the GI<sub>50</sub> value of empty vector (Vector) cells.

**Table S3.** Expression pattern of zebrafish *abcb4* and *abcb5*<sup>a</sup>

| <b>Organ</b> | <b><i>abcb4</i></b> | <b><i>abcb5</i></b> |
|--------------|---------------------|---------------------|
| Brain        | +++                 | -                   |
| Liver        | +++                 | +                   |
| Kidney*      | ++                  | ++                  |
| Skin         | -                   | +++                 |
| Ovary        | +                   | +++                 |
| Intestine    | +++                 | -                   |
| Gill         | -                   | +++                 |

<sup>a</sup>Selected organs were evaluated for semi-quantitative scoring for each marker.

\*Distinct regions of the nephron are positive for either *abcb4* or *abcb5* (not both).

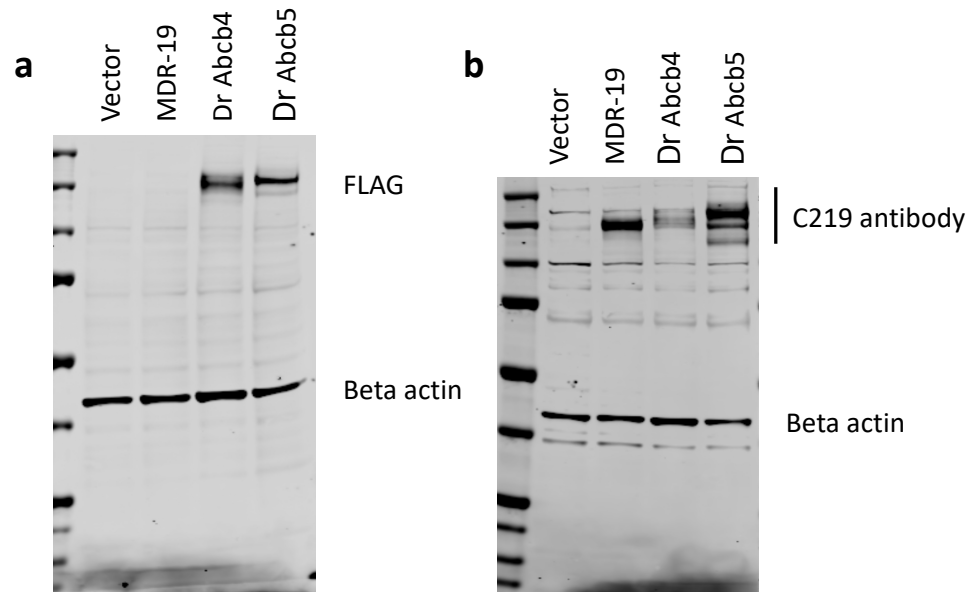

**Figure S1.** Full blots used in Fig. 1. Whole cell lysates were prepared and separated via PAGE as outlined in the legend to Fig. 1. Blots were probed with anti-FLAG antibody and beta actin (a) or anti-ABCB1 antibody C219 and beta-actin (b).

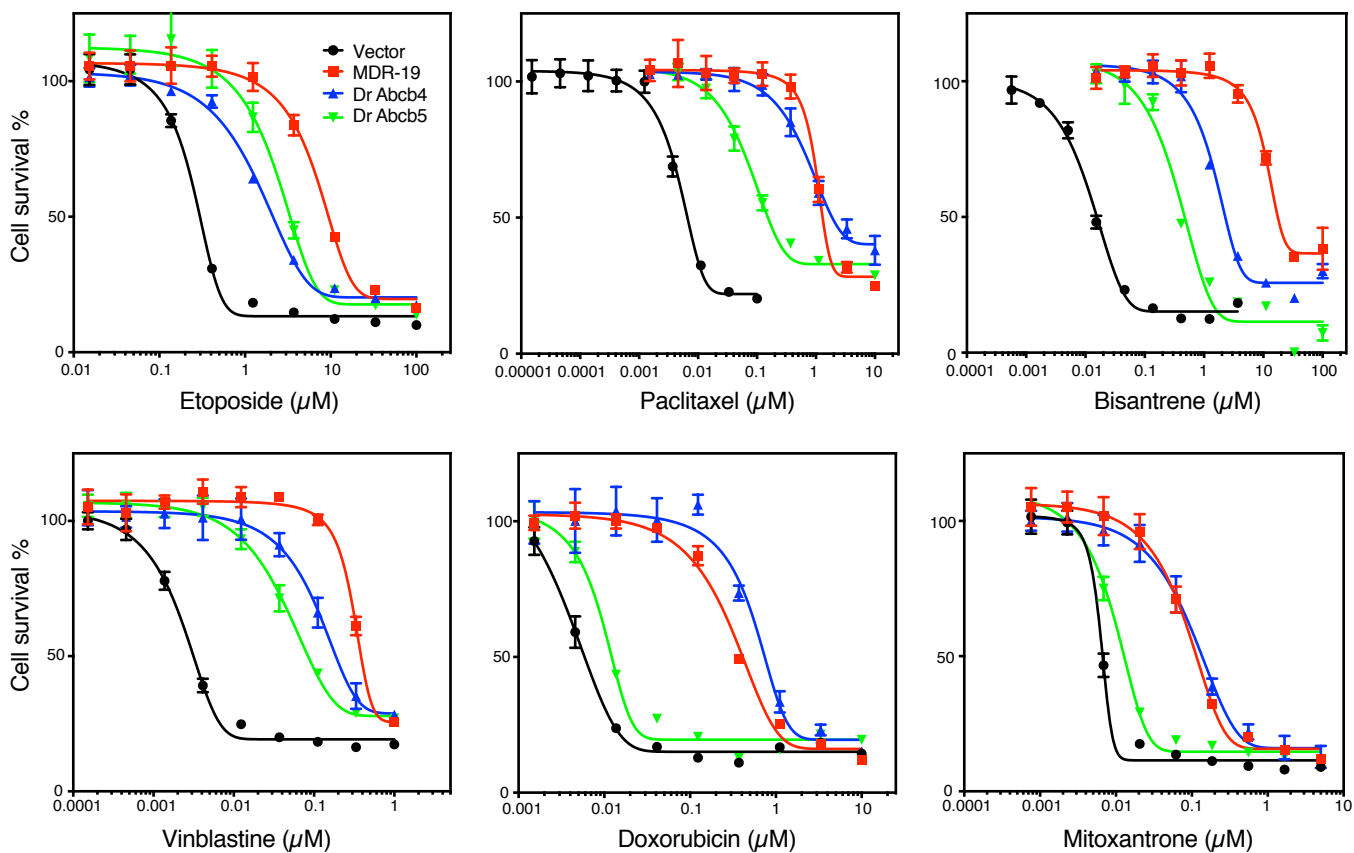

**Figure S2.** Zebrafish Abcb4 and Abcb5 confer differential resistance to known P-gp substrates. Three-day cytotoxicity assays were performed with the known human P-gp substrates etoposide, paclitaxel, bisantrene, vinblastine, doxorubicin and mitoxantrone on HEK-293 cells transfected with empty-vector cells (Vector, black curve) or cells expressing human P-gp (MDR-19, red curve), zebrafish Abcb4 (Dr Abcb4, blue curve), or zebrafish Abcb5 (Dr Abcb5, green curve). GI50 values were obtained from the curves and are summarized in Table S1.

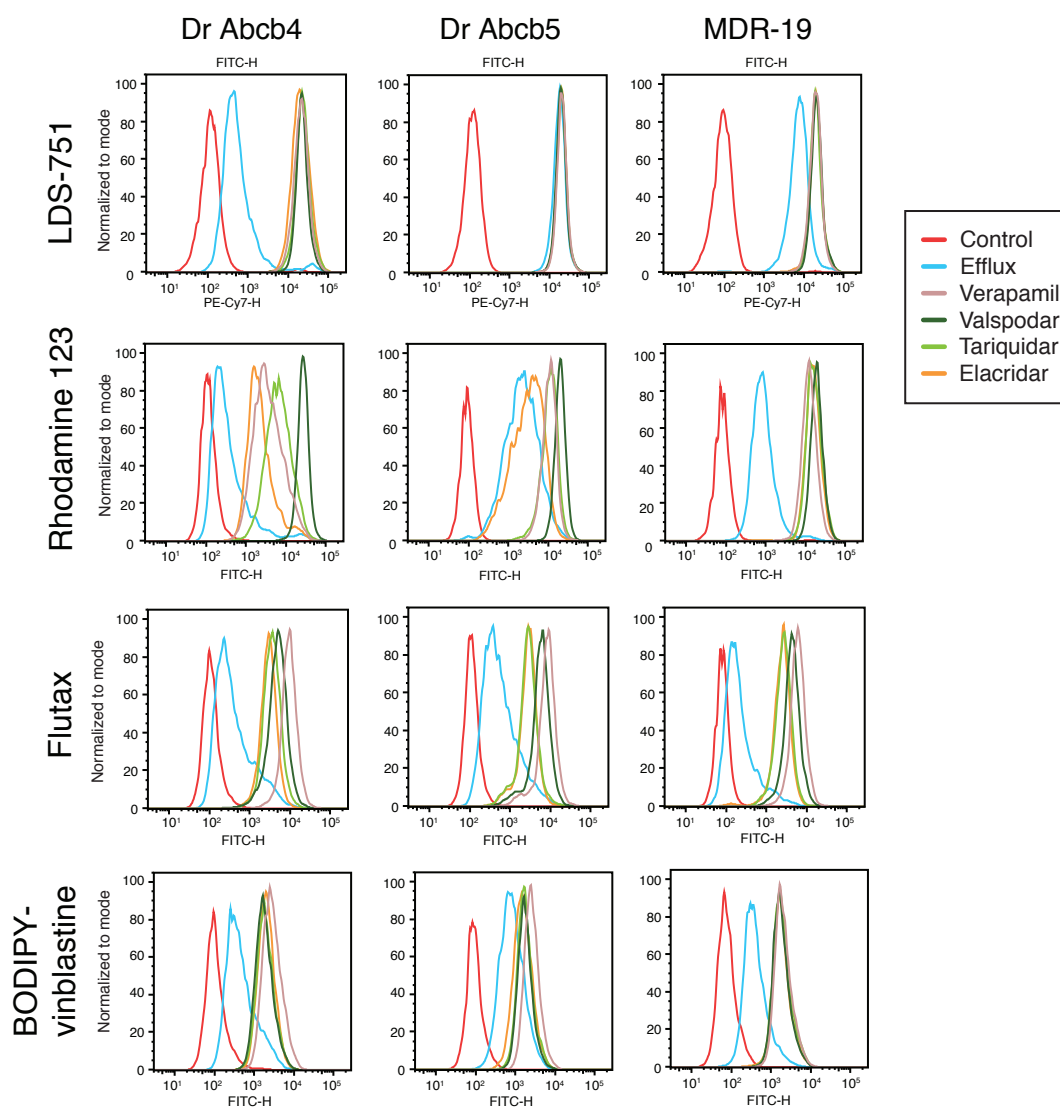

**Figure S3.** Zebrafish Abcb4 and Abcb5 differentially transport fluorescent P-gp substrates. HEK293 cells transfected to express zebrafish Abcb4 (Dr Abcb4), zebrafish Abcb5 (Dr Abcb5) or human P-gp (MDR-19) were incubated in medium with 0.5  $\mu$ M LDS 751, 0.5  $\mu$ g/ml rhodamine 123, 5  $\mu$ M Flutax or 250 nM BODIPY vinblastine in the presence or absence of 10  $\mu$ M elacridar, 10  $\mu$ M tariquidar, 10  $\mu$ M valspodar, or 100  $\mu$ M verapamil for 30 min. The medium was removed and replaced with substrate-free medium in the presence or absence of inhibitor for an additional 1 h.

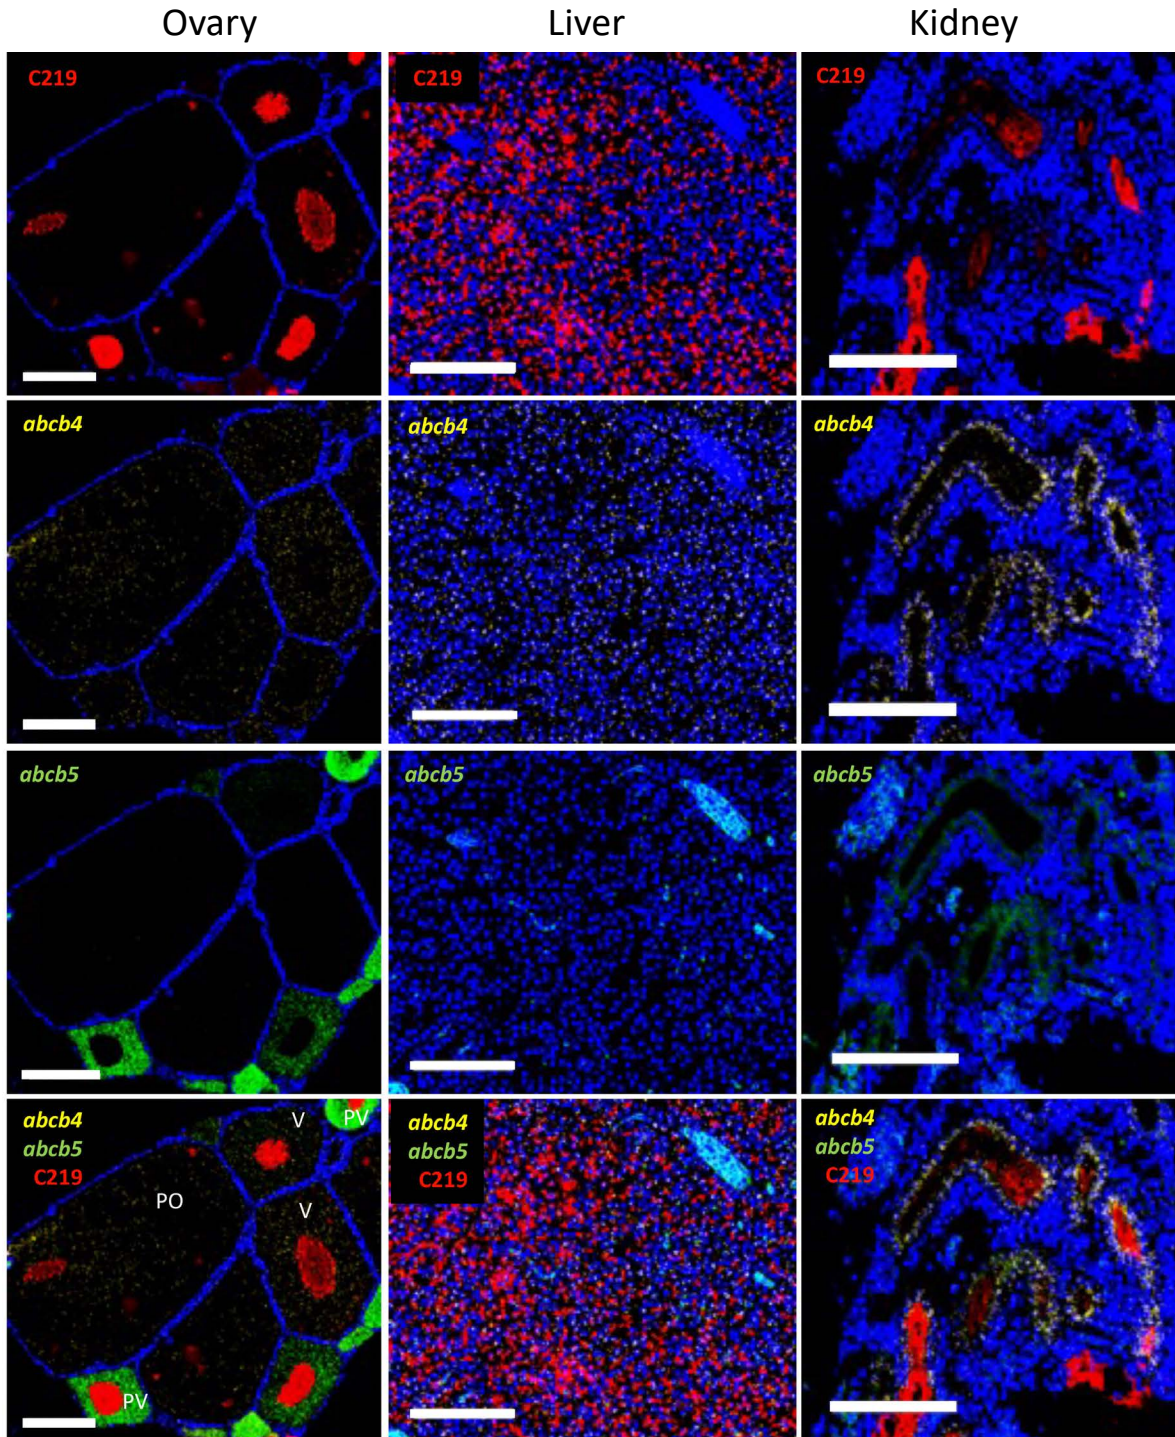

**Figure S4.** Zebrafish *abc4* and *abc5* RNA-ISH with C219 immunolabeling in the ovary, liver, and kidney of adult zebrafish. Zebrafish sections were stained with RNAscope® *abc4* (yellow) and *abc5* (green) probes followed by the C219 antibody (red) as outlined in Materials and Methods. In the ovary, unique staining patterns are observed for different follicular stages. While *abc4* is expressed throughout all follicular stages, *abc5* is expressed at high levels in early pre-vitellogenic (PV) stages and lost at later stage (V, vitellogenic; PO, preovulatory follicles). Liver and kidney express predominantly *abc4*. Fluorescence channels were interrogated individually and merged. Bars = 100  $\mu$ m. Nuclei were stained with DAPI (blue).



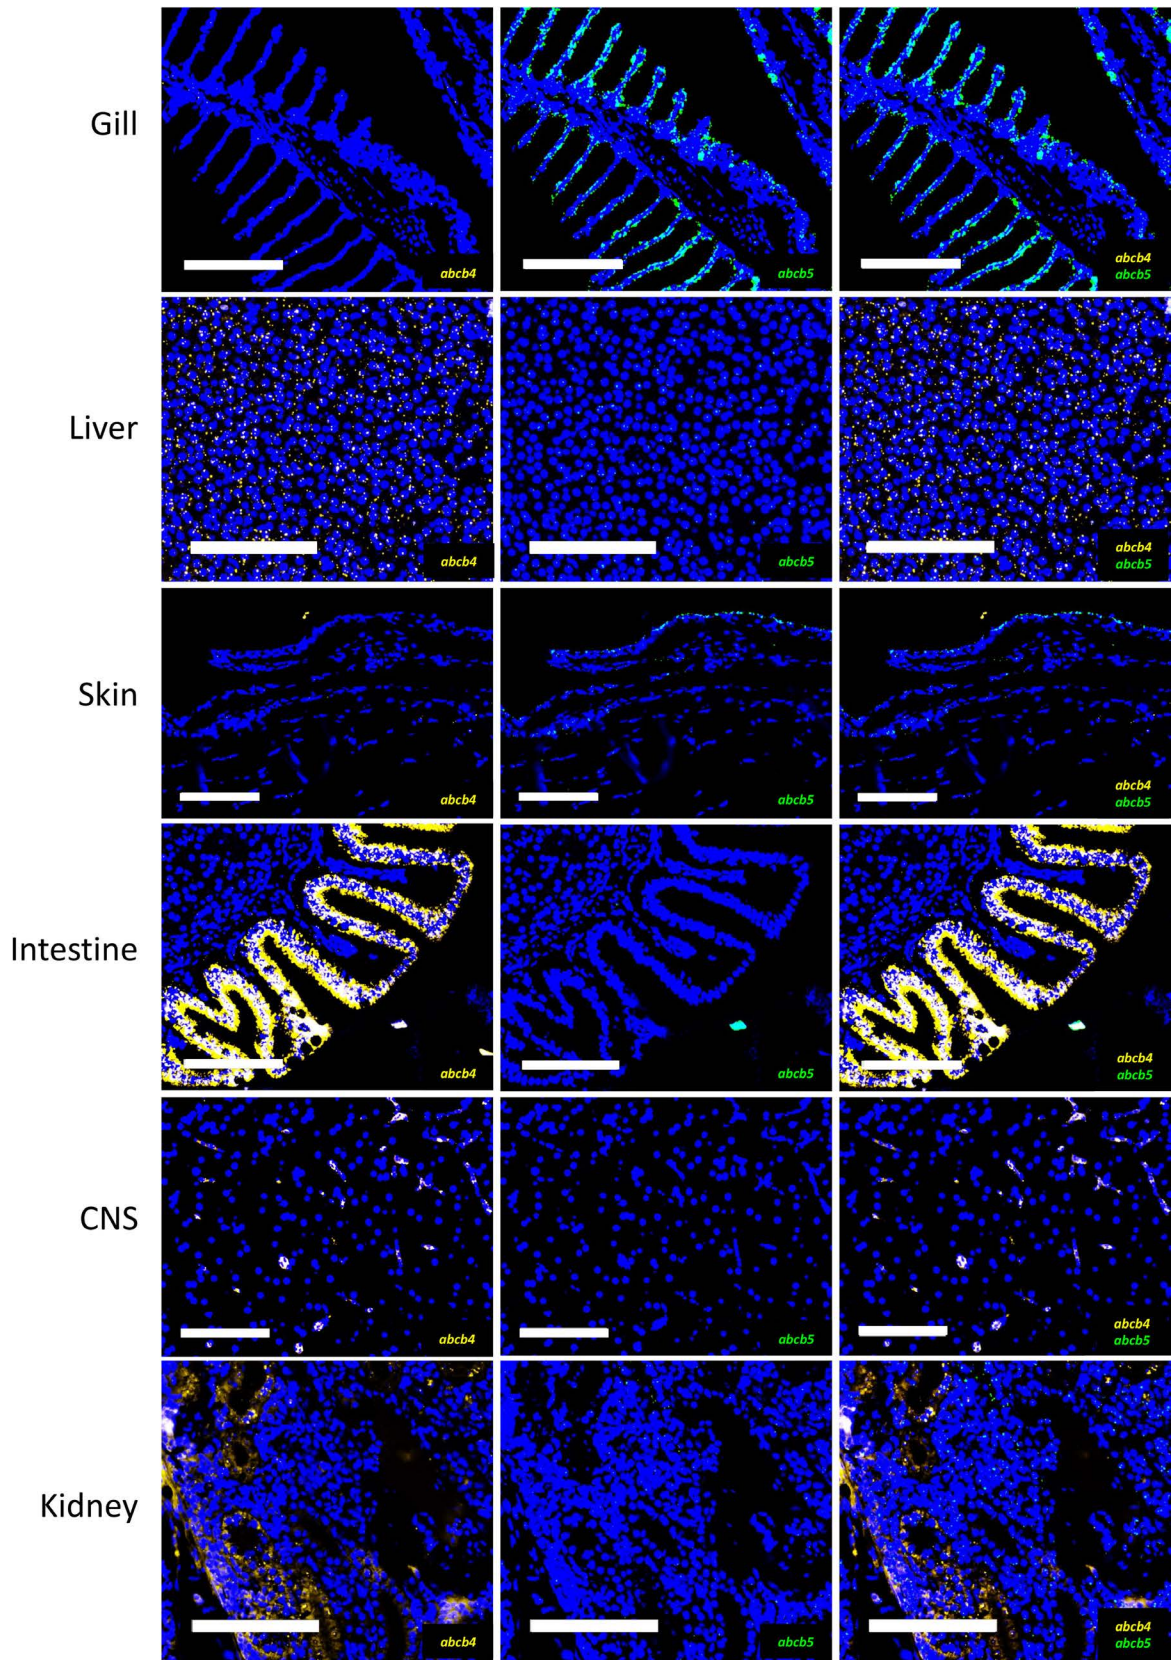

**Figure S5.** Zebrafish *abcb4* and *abcb5* signal following RNA-ISH. Multiplex RNA-ISH for *abcb4* (yellow) and *abcb5* (green) is performed as outlined in Materials and Methods. Nuclei were stained with DAPI (blue). Fluorescence channels were interrogated individually and merged. Bars = 100  $\mu$ m.
